# Supplementary material for: Synthesis of new fused heterocyclic aromatic hydrocarbons via C–S and C–C bond formation by C–H bond activation in the presence of new Pd(ii) Schiff's base complexes
Source: Royal Society of Chemistry journal article supplement (doi:10.1039/c6ra15609f), 2016-01-01
Supplement: c6ra15609f1.pdf [file c6ra15609f1.pdf]

## Synthesis of New Fused Heterocyclic Aromatic Hydrocarbons via C-S and C-C bonds formation by C-H Bond Activation in the Presence of New Pd(II) Schiff's Base Complexes

Someshwar Pola,<sup>a\*</sup> Yadagiri Bhongiri,<sup>a</sup> Ramchander Jadhav,<sup>a</sup> Prabhakar Chetti<sup>b</sup> and Venkanna G,<sup>a</sup>

a. Department of Chemistry, Osmania University, Hyderabad, India.

b. Department of Chemistry, National Institute of Technology, Kurukshetra, India

### Analytical data

#### **3,3'-(piperazine-1,4-diyl)bis(3-phenylpropanal) (PDBDP):**

The purify the material by recrystallized from methanol to get pure product (1.21 g) in 74% yield. <sup>1</sup>H-NMR (400 MHz, CDCl<sub>3</sub>),  $\delta$  (ppm): 9.63 (m, 2H, CH=O), 7.65 – 7.27 (m, 10H, Ar-Hs), 4.34 – 4.29 (m, 2H, Ar-CH-CH<sub>2</sub>), 2.66 (s, 8H, piperzine-CH<sub>2</sub>), 2.34 (d, 2H, -CH<sub>2</sub>-CHO) and 2.15 (d, 2H, -CH<sub>2</sub>-CHO); HRMS (FAB+) cald. For C<sub>22</sub>H<sub>26</sub>N<sub>2</sub>O<sub>2</sub>: 350.2 found: 351.2 (M<sup>+</sup>+1).

#### **3,3'-(piperazine-1,4-diyl)bis(1,3-diphenylpropan-1-one) (PDBDPP)**

The purify the material by recrystallized from methanol to get pure product (3.21 g) in 64% yield. <sup>1</sup>H-NMR (400 MHz, CDCl<sub>3</sub>),  $\delta$  (ppm): 8.15 – 7.53 (m, 20H, Ar-Hs), 4.37 – 4.34 (m, 2H, Ar-CH-CH<sub>2</sub>), 3.55 (d, 2H, -CH-CH<sub>2</sub><sup>c</sup>-Ar), 3.15 (d, 2H, -CH-CH<sub>2</sub><sup>b</sup>-Ar) and 2.79 (s, 8H, piperzine-CH<sub>2</sub>); HRMS (FAB+) cald. For C<sub>32</sub>H<sub>34</sub>N<sub>2</sub>O<sub>2</sub>: 502.2 found: 502.2 (M<sup>+</sup>).

#### **2,15-Diphenyl-1,5,12,16-tetraaza-tricyclo[14.2.2.06,11]eicosa-4,6(11),7,9,12-pentaene (DPTTP)**

The purify the material by recrystallized from methanol to get pure product (3.16 g) in 75% yield. <sup>1</sup>H-NMR (400 MHz, CDCl<sub>3</sub>),  $\delta$  (ppm): 8.93 (m, 2H, -CH=N-), 7.86 – 7.06 (m, 14H, Ar-Hs), 3.56 (m, 2H, Ar-CH-CH<sub>2</sub>), 2.68 (s, 8H, piperzine-CH<sub>2</sub>), 1.98 (d, 2H, -CH<sub>2</sub>-C=N) and 1.89 (d, 2H, -CH<sub>2</sub>-C=N); HRMS (FAB+) cald. For C<sub>28</sub>H<sub>30</sub>-N<sub>4</sub>: 422.2 found: 422.2 (M<sup>+</sup>).

#### **2,4,13,15-Tetraphenyl-1,5,12,16-tetraaza-tricyclo[14.2.2.06,11]eicosa-4,6(11),7,9,12-pentaene (TPTTP)**

The purify the material by recrystallized from ethanol to get pure product (3.9 g) in 68% yield. <sup>1</sup>H-NMR (400 MHz, CDCl<sub>3</sub>),  $\delta$  (ppm): 7.89 – 7.29 (m, 24H, Ar-Hs), 4.04 – 3.97 (m, 2H,

Ar-CH-CH<sub>2</sub>), 2.74 (s, 8H, piperzine-CH<sub>2</sub>), 2.24 (d, 2H, -CH-CH<sub>2</sub>-Ar), 1.99 (d, 2H, -CH-CH<sub>2</sub>-Ar); HRMS (FAB+) cald. For C<sub>40</sub>H<sub>38</sub>N<sub>4</sub>: 574.30 found: 574.30 (M<sup>+</sup>).

#### **Pd(DPTTP)Cl<sub>2</sub>:**

The purify the complex by recrystallized from 1,4-dioxane to get pure product in 63% yield. <sup>1</sup>H-NMR (400 MHz, CDCl<sub>3</sub>),  $\delta$  (ppm): 8.92 & 8.45 (d, 2H, (C<sub>6</sub>H<sub>4</sub>N<sub>2</sub>)=), 8.73 (m, 2H, CH=O), 7.81 – 7.23 (m, 10H, Ar-Hs), 4.89 (m, 2H, Ar-CH-CH<sub>2</sub>), 3.45 (s, 8H, piperzine-CH<sub>2</sub>), 3.21 (d, 2H, -CH<sub>2</sub>-C=N) and 2.76 (d, 2H, -CH<sub>2</sub>-C=N); HRMS (FAB+) cald. For C<sub>28</sub>H<sub>30</sub>Cl<sub>2</sub>N<sub>4</sub>Pd: 598.09 found: 598.09 (M<sup>+</sup>).

#### **Pd(TPTTP)Cl<sub>2</sub>:**

The purify the material by recrystallized from tetrahydrofuran to get pure product in 68% yield. <sup>1</sup>H-NMR (400 MHz, CDCl<sub>3</sub>),  $\delta$  (ppm): 9.07 & 8.30 (d, 2H, (C<sub>6</sub>H<sub>4</sub>N<sub>2</sub>)=), 7.79 – 7.27 (m, 20H, Ar-Hs), 4.79 – 4.72 (m, 2H, Ar-CH-CH<sub>2</sub>), 3.77 (s, 8H, piperzine-CH<sub>2</sub>), 2.31 (d, 2H, -CH-CH<sub>2</sub>-Ar), 2.15 (d, 2H, -CH-CH<sub>2</sub>-Ar); HRMS (FAB+) cald. For C<sub>40</sub>H<sub>38</sub>Cl<sub>2</sub>N<sub>4</sub>Pd: 752.08 found: 752.08 (M<sup>+</sup>).

### **Synthesis of pyrido[3',2':6,7][1,4]thiazepino[2,3-h][1,6]naphthyridine and its derivatives**

#### **Pyrido[3',2':6,7][1,4]thiazepino[2,3-h][1,6]naphthyridine (compound 1a):**

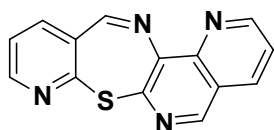

<sup>1</sup>H-NMR (400 MHz, CDCl<sub>3</sub>),  $\delta$  ppm: 9.203 (s, 1H), 9.077 (d, 1H, J = 5.2 Hz), 8.679 (d, 1H, J = 6.0 Hz), 8.211 (d, 1H, J = 3.2 Hz), 7.977 (d, 1H, J = 4.4 Hz), 7.856 (s, 1H) and 7.796 – 7.664 (m, 2H); <sup>13</sup>C-NMR (100 MHz, CDCl<sub>3</sub>),  $\delta$  ppm: 179.550, 160.880, 159.349, 155.476, 152.072, 150.129, 148.962, 137.503, 129.920, 124.803, 123.072, 122.081, 121.857 and 120.223 HRMS (EI): cald. for C<sub>14</sub>H<sub>8</sub>N<sub>4</sub>S: 264.047, found: 265.05 (M<sup>+</sup> + 1).

#### **Benzo[b]quinolino[3',2':6,7][1,4]thiazepino[2,3-h][1,6]naphthyridine (compound 1b):**

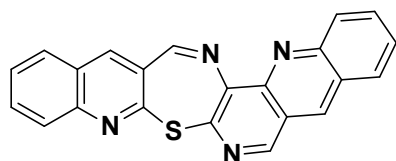

$^1\text{H-NMR}$  (400 MHz,  $\text{CDCl}_3$ ),  $\delta$  ppm: 9.07 (s, 1H), 8.888 (s, 1H), 8.705 (s, 1H), 8.145 (d, 1H,  $J = 8$  Hz), 8.092 (d, 1H,  $J = 7.2$  Hz), 7.972 (d, 2H,  $J = 7.2$  Hz), 7.838 (d, 2H,  $J = 6$  Hz), 7.657 – 7.623 (m, 2H) and 7.577 (s, 1H);  $^{13}\text{C-NMR}$  (100 MHz,  $\text{CDCl}_3$ ),  $\delta$  ppm: 178.438, 162.166, 152.097, 148.477, 146.443, 144.620, 142.036, 137.524, 136.067, 133.624, 131.998, 128.929, 128.686, 126.951, 126.660, 124.815, 122.097, 120.228 and 118.816; HRMS (EI): cald. for  $\text{C}_{22}\text{H}_{12}\text{N}_4\text{S}$ : 364.078, found: 364.09 ( $\text{M}^+$ ).

**3,12-dimethylbenzo[b]quinolino[3',2':6,7][1,4]thiazepino[2,3-h][1,6]naphthyridine (compound 1c):**

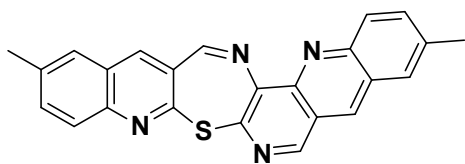

$^1\text{H-NMR}$  (400 MHz,  $\text{CDCl}_3$ ),  $\delta$  ppm: 9.099 (s, 1H), 8.725 (s, 1H), 8.325 (s, 1H), 8.162 (m, 1H), 8.094 (d, 1H,  $J = 8$  Hz), 7.977 (d, 1H,  $J = 7.2$  Hz), 7.757 (d, 2H,  $J = 5.2$  Hz), 7.569 (d, 2H,  $J = 4.8$  Hz), 7.462 (s, 1H) and 2.799 (s, 6H);  $^{13}\text{C-NMR}$  (100 MHz,  $\text{CDCl}_3$ ),  $\delta$  ppm: 181.166, 162.076, 153.706, 149.794, 143.249, 138.474, 137.496, 136.166, 126.706, 126.662, 126.194, 124.803, 123.965, 122.089, 120.223 and 21.653; HRMS (EI): cald. for  $\text{C}_{24}\text{H}_{16}\text{N}_4\text{S}$ : 392.110, found: 392.11 ( $\text{M}^+$ ).

**3,12-dichlorobenzo[b]quinolino[3',2':6,7][1,4]thiazepino[2,3-h][1,6]naphthyridine (compound 1d):**

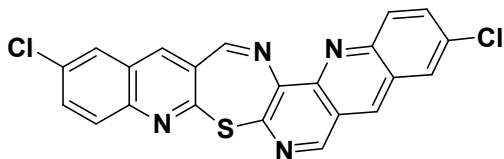

$^1\text{H-NMR}$  (400 MHz,  $\text{CDCl}_3$ ),  $\delta$  ppm: 9.240 (s, 1H), 8.890 (s, 1H), 8.728 (s, 1H), 8.265 (m, 1H), 8.145 (d, 1H,  $J = 8$  Hz), 7.872 (d, 2H,  $J = 7.2$  Hz), 7.657 (d, 2H,  $J = 5.2$  Hz) and 7.444 (s, 1H);  $^{13}\text{C-NMR}$  (100 MHz,  $\text{CDCl}_3$ ),  $\delta$  ppm: 183.026, 154.983, 150.022, 144.107, 139.643, 138.881, 137.204, 136.034, 129.956, 129.783, 129.309, 128.891, 127.356, 125.438, 124.731, 123.643 and 121.803; HRMS (EI): cald. for  $\text{C}_{22}\text{H}_{10}\text{Cl}_2\text{N}_4\text{S}$ : 432.00, found: 432.00 ( $\text{M}^+$ ).

**Pyrido[3',2':6,7][1,4]thiazepino[2,3-c][2,6]naphthyridine (compound 1f):**

$^1\text{H-NMR}$  (400 MHz,  $\text{CDCl}_3$ ),  $\delta$  ppm: 9.431 (s, 1H), 9.165 (d, 1H,  $J = 5.2$  Hz), 9.079 (d, 1H,  $J = 4.2$  Hz), 8.601 (d, 1H,  $J = 5.6$  Hz), 8.312 (d, 1H,  $J = 3.2$  Hz), 7.906 (d, 1H,  $J = 4.8$  Hz), 7.548 (s, 1H) and 7.492 (m, 1H);  $^{13}\text{C-NMR}$  (100 MHz,  $\text{CDCl}_3$ ),  $\delta$  ppm: 180.989, 161.280, 158.949, 154.716,

153.872, 151.924, 148.362, 138.003, 130.202, 125.612, 124.706, 123.316, 121.957 and 120.843  
HRMS (EI): cald. for C<sub>14</sub>H<sub>8</sub>N<sub>4</sub>S: 264.047, found: 265.05 (M<sup>+</sup> + 1).

**Pyrido[3',2':6,7][1,4]thiazepino[3,2-f][1,7]naphthyridine (compound 1g):**

<sup>1</sup>H-NMR (400 MHz, CDCl<sub>3</sub>), δ ppm: 9.125 (s, 1H), 8.872 (s, 1H), 8.655 (d, 1H, J = 2.8 Hz), 8.458 (d, 1H, J = 5.6 Hz), 8.265 (m, 1H), 8.145 (d, 1H, J = 8 Hz), 7.584 (s, 1H) and 7.458 (d, 1H, J = 4.0 Hz); <sup>13</sup>C-NMR (100 MHz, CDCl<sub>3</sub>), δ ppm: 180.103, 162.028, 159.349, 155.516, 154.063, 152.401, 147.992, 139.105, 131.814, 125.857, 125.212, 124.113, 122.361 and 121.013 HRMS (EI): cald. for C<sub>14</sub>H<sub>8</sub>N<sub>4</sub>S: 264.047, found: 265.05 (M<sup>+</sup> + 1).

**Pyrido[3,2-f]thieno[3',2':4,5]pyrido[2,3-b][1,4]thiazepine (compound 1h):**

<sup>1</sup>H-NMR (400 MHz, CDCl<sub>3</sub>), δ ppm: 8.548 (d, 1H, J = 2.8 Hz), 8.262 (s, 1H), 7.912 (d, 1H, J = 2.8 Hz), 7.748 (s, 1H), 7.622 (m, 1H), 7.571 (d, 1H, J = 3.6 Hz) and 7.369 (d, 1H, J = 2.8 Hz); <sup>13</sup>C-NMR (100 MHz, CDCl<sub>3</sub>), δ ppm: 178.991, 159.889, 152.829, 150.211, 148.284, 138.302, 136.214, 132.655, 131.983, 126.326, 124.601, 122.845 and 121.421 HRMS (EI): cald. for C<sub>13</sub>H<sub>7</sub>N<sub>3</sub>S<sub>2</sub>: 269.08, found: 270.07 (M<sup>+</sup> + 1).

**Pyrido[3',2':6,7][1,4]thiazepino[2,3-c]isoquinoline (compound 1i):**

<sup>1</sup>H-NMR (400 MHz, CDCl<sub>3</sub>), δ ppm: 8.777 (d, 1H, J = 2.8 Hz), 8.551 (d, 1H, J = 2.8 Hz), 8.248 (d, 1H, J = 3.6 Hz), 8.045 (d, 1H, J = 2.8 Hz) and 7.657 – 7.532 (m, 5H); <sup>13</sup>C-NMR (100 MHz, CDCl<sub>3</sub>), δ ppm: 179.892, 163.236, 161.902, 153.009, 151.523, 137.985, 134.672, 133.095, 131.631, 130.356, 128.515, 124.824, 122.425 and 120.836 HRMS (EI): cald. for C<sub>15</sub>H<sub>9</sub>N<sub>3</sub>S: 263.05, found: 263.05 (M<sup>+</sup>).

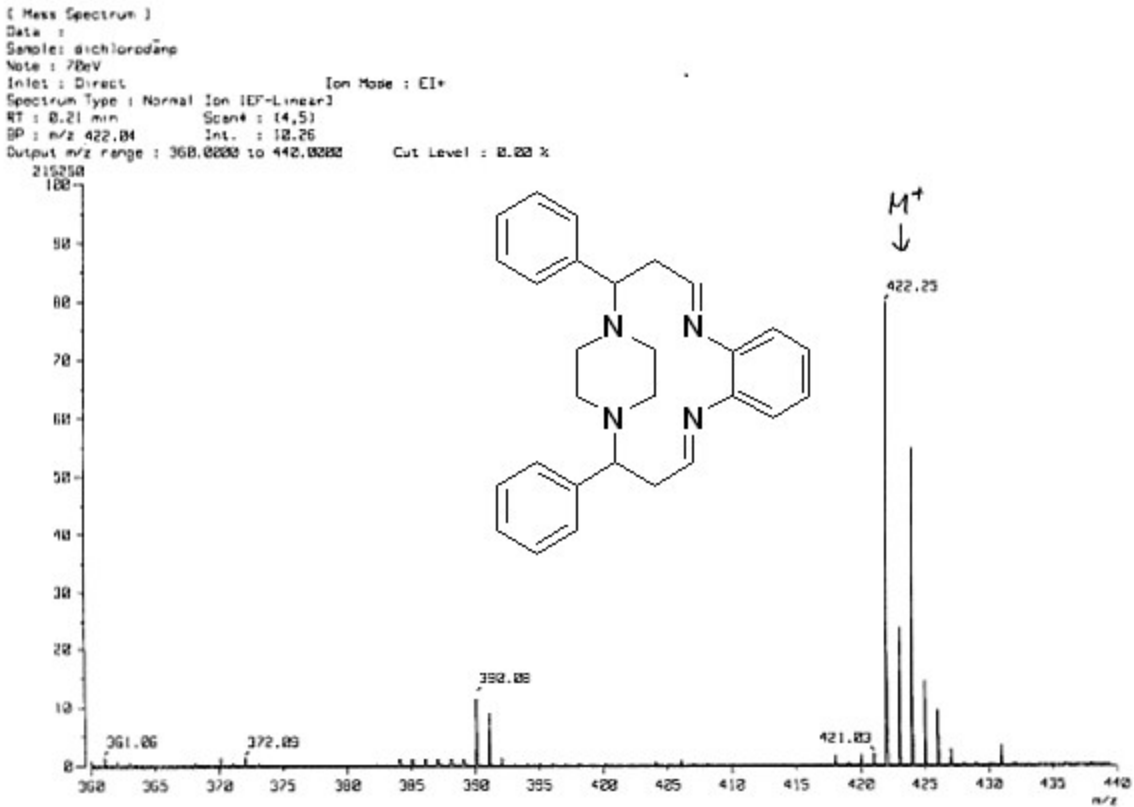

**Fig. S1 Mass spectrum of DPTTP ligand**

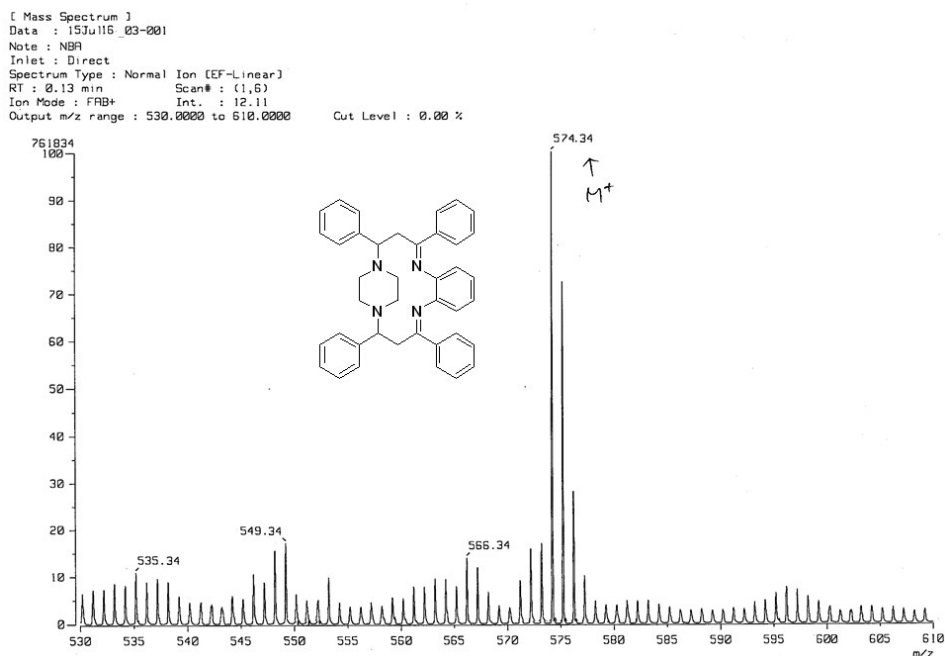

**Fig. S2 Mass spectrum of TPTTP ligand**

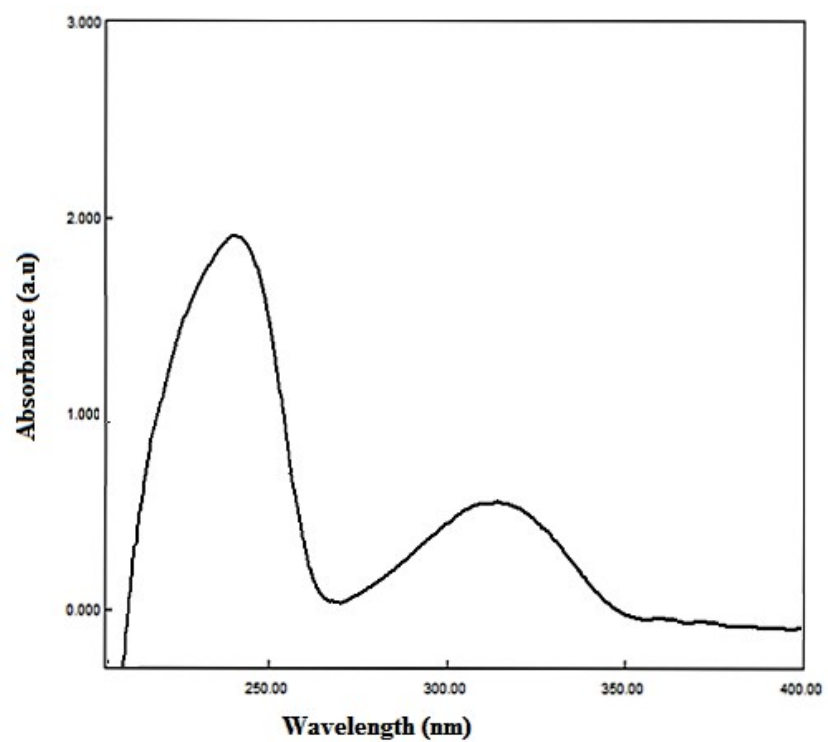

**Fig. S3 UV spectrum of DPTTP ligand**

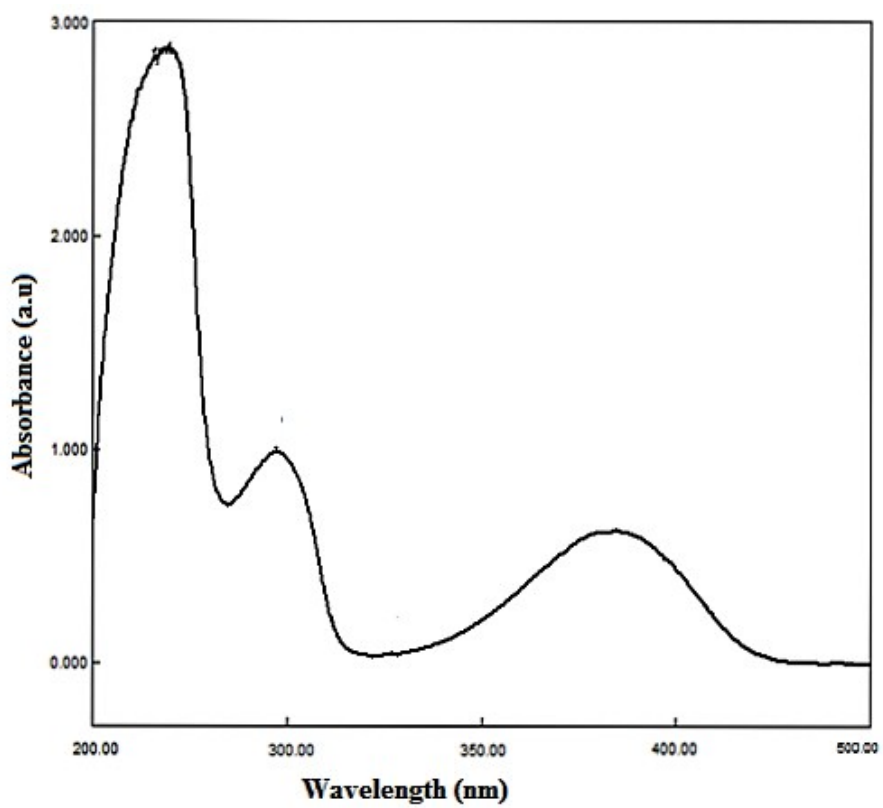

Fig. S4 UV spectrum of TPTTP ligand

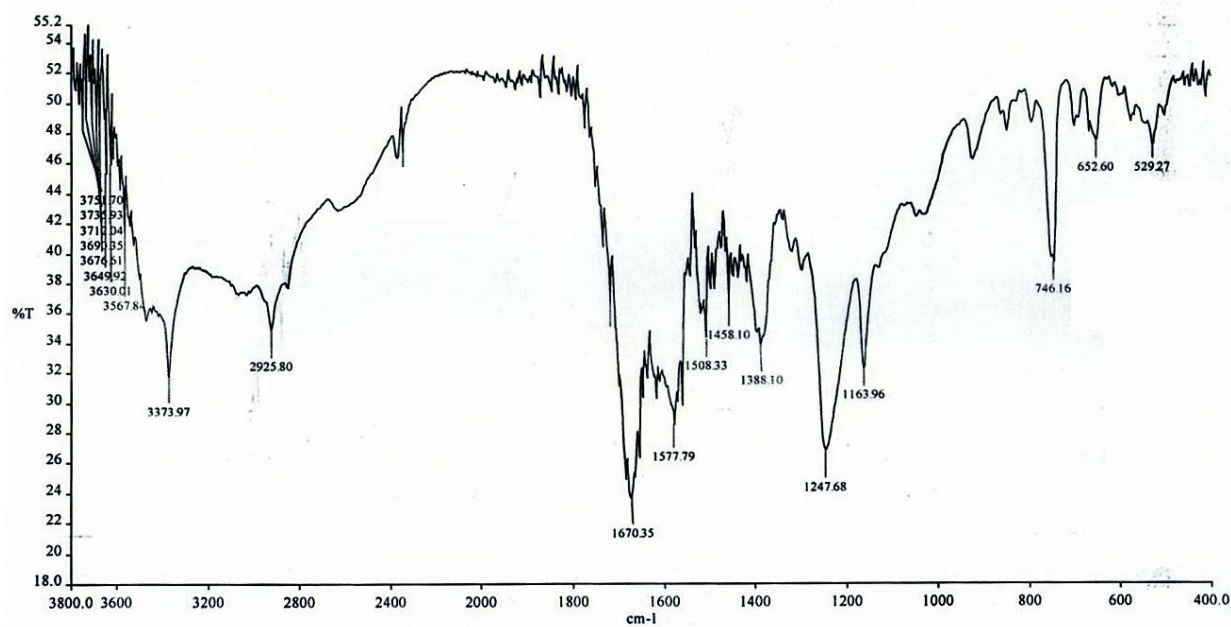

Fig. S5 IR spectrum of DPTTP ligand

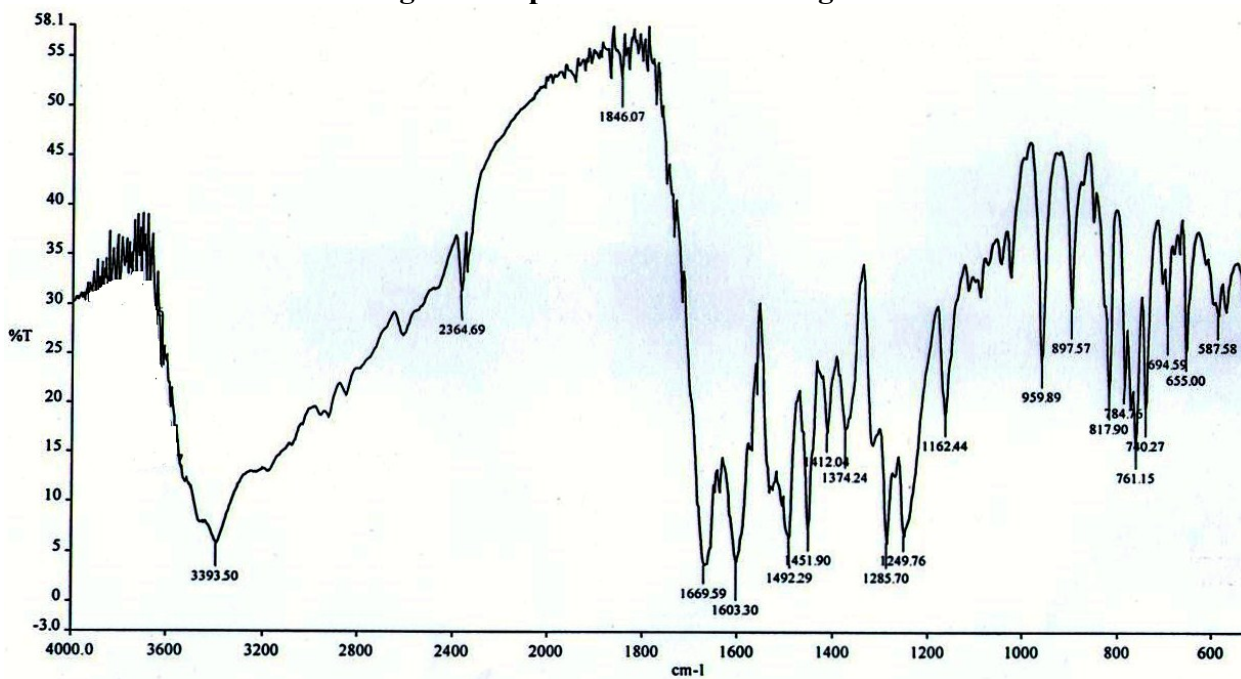

Fig. S6 IR spectrum of TPTTP ligand

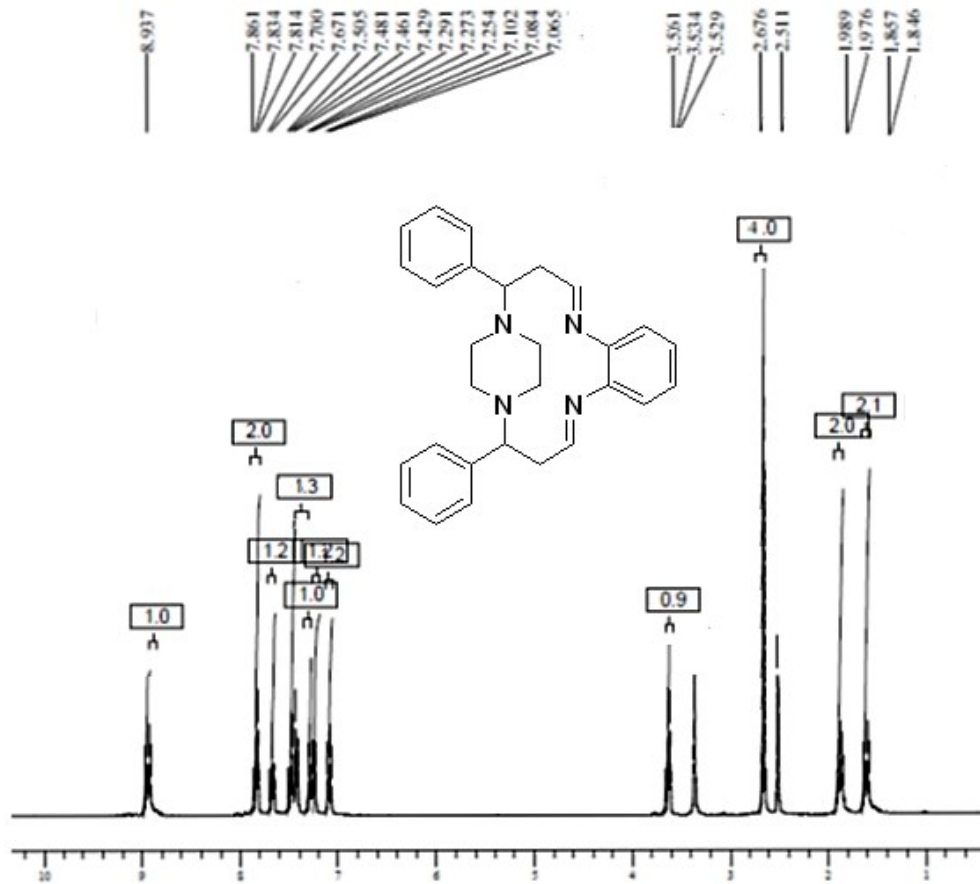

Fig. S7 <sup>1</sup>H-NMR Spectrum of DPTTP ligand

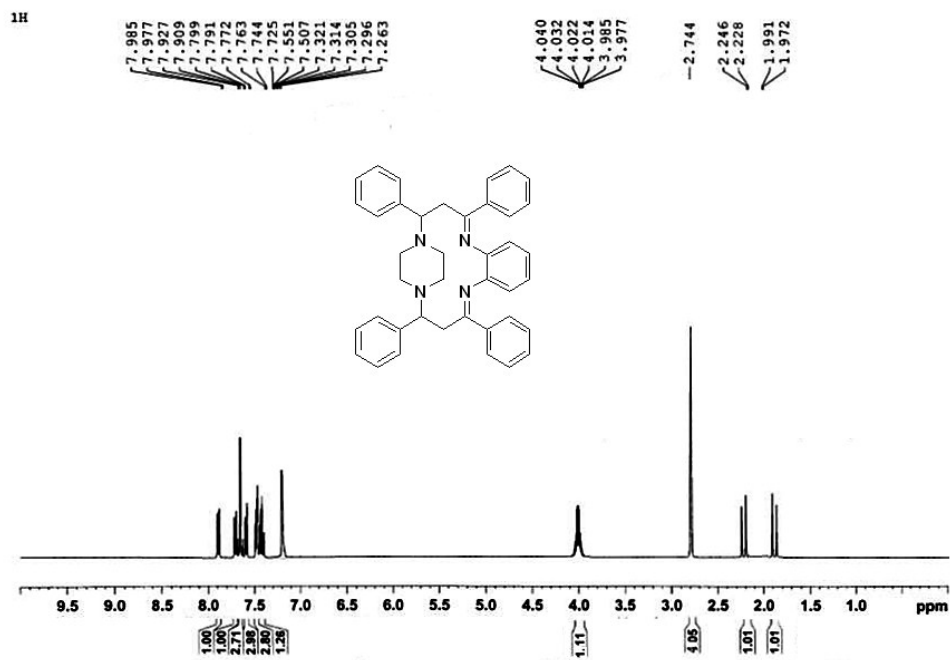



Fig. S8  $^1\text{H-NMR}$  spectrum of TPTTP ligand

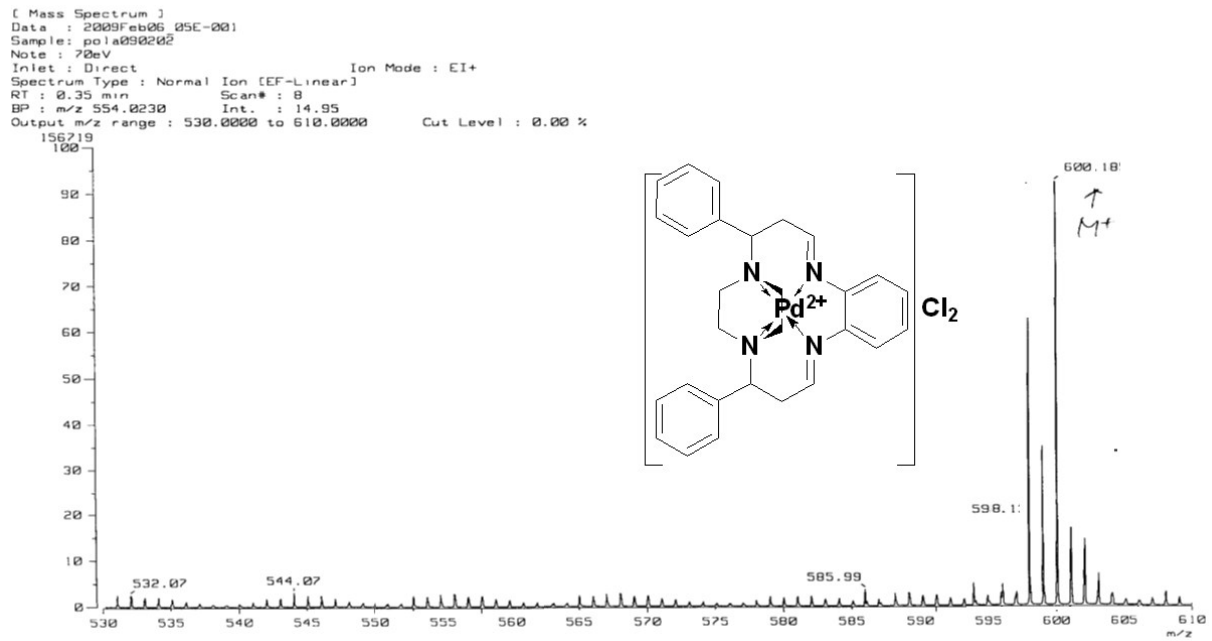

Fig. S9 Mass spectrum of  $\text{Pd}(\text{DPTTP})\text{Cl}_2$

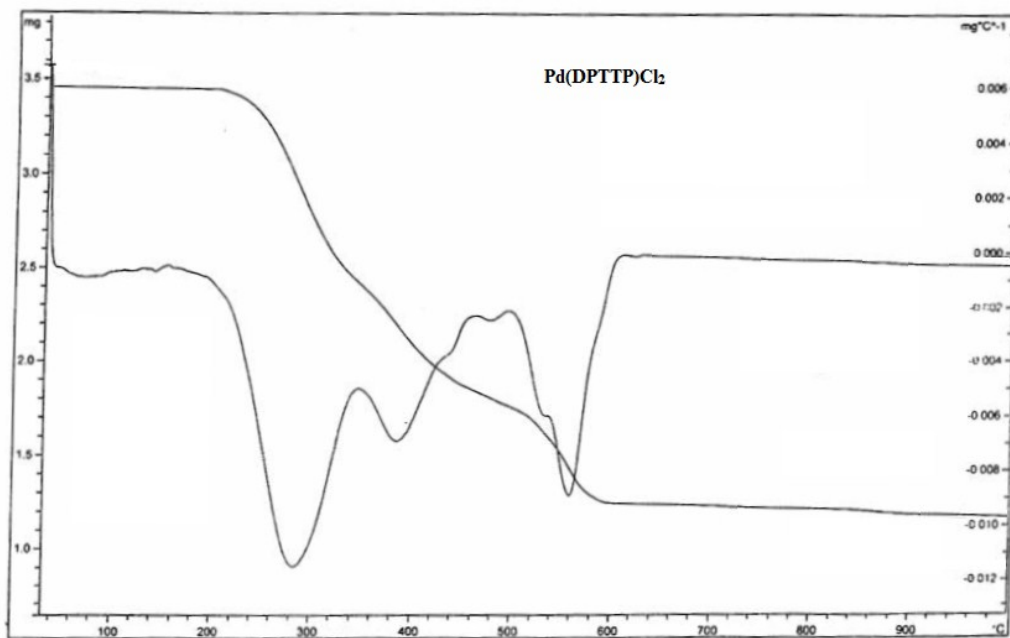

Fig. S10 Thermogram of  $\text{Pd}(\text{DPTTP})\text{Cl}_2$

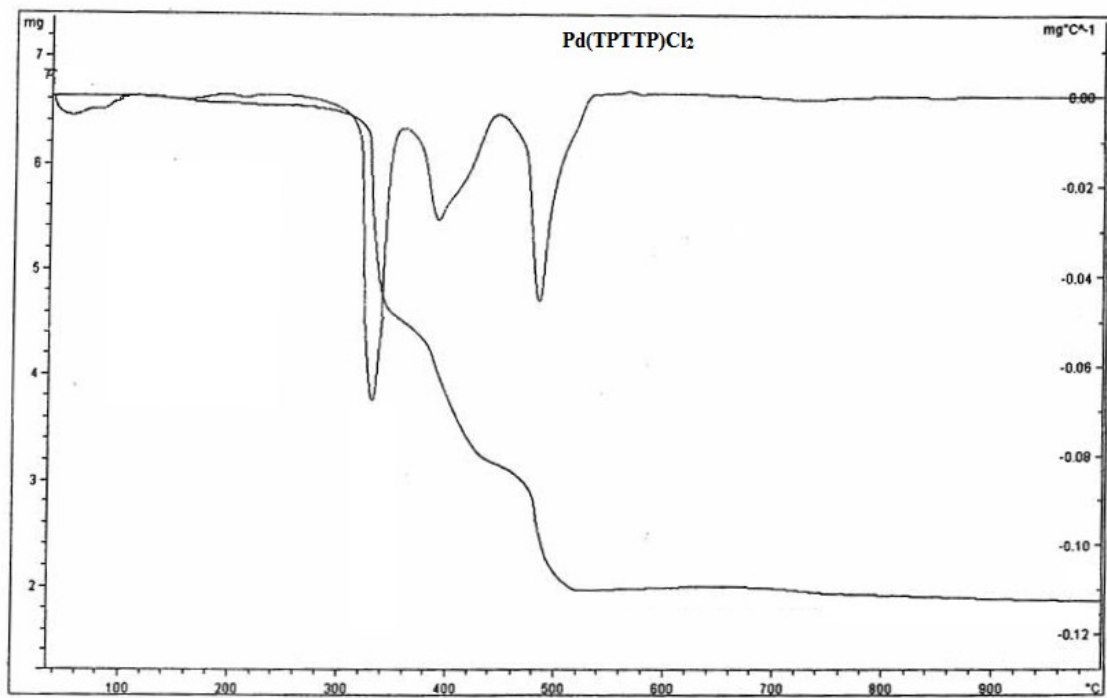

Fig. S11 Thermogram of Pd(TPTTP)Cl<sub>2</sub>

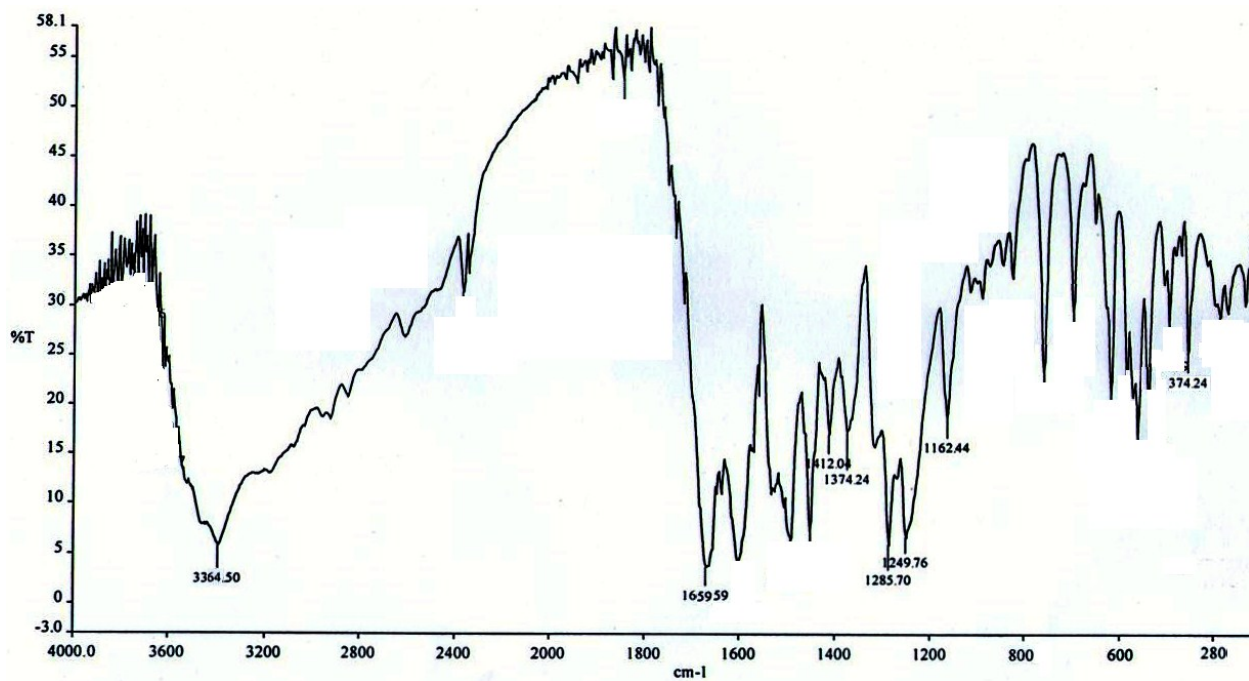

Fig. S12 IR spectrum of Pd(TPTTP)Cl<sub>2</sub>

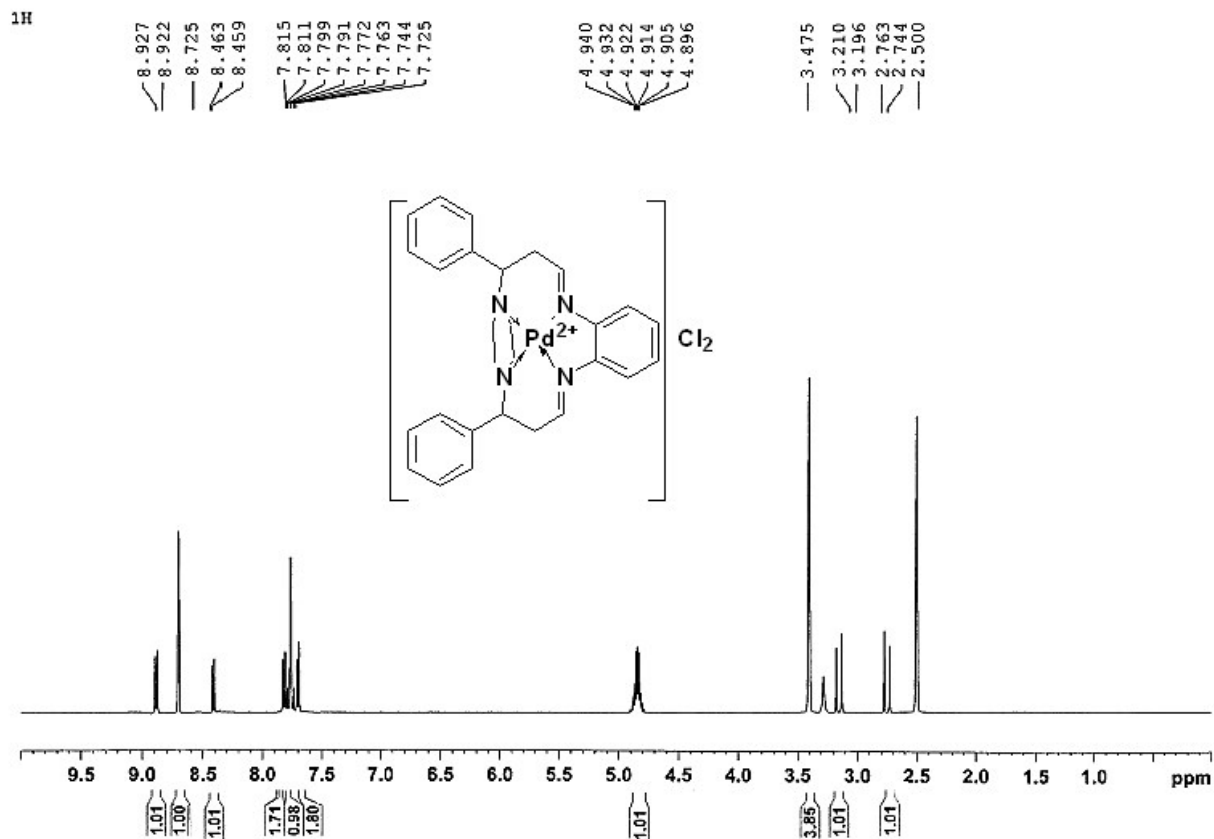

Fig. S13 <sup>1</sup>H-NMR spectrum of Pd(DPTTP)Cl<sub>2</sub> complex

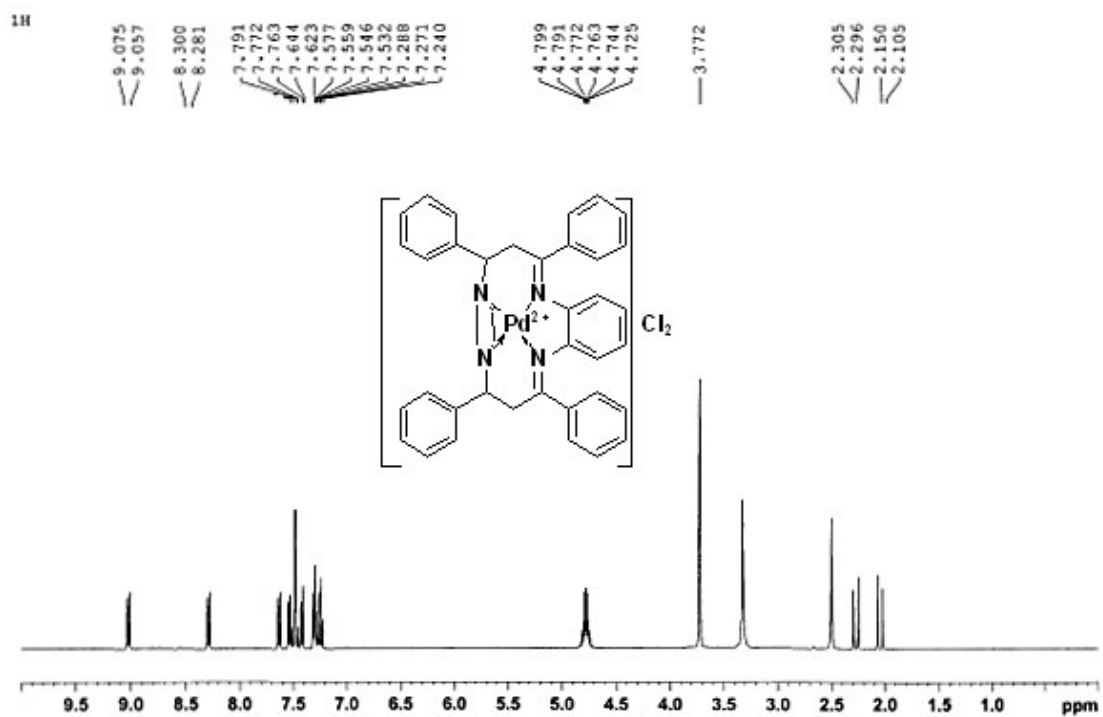

Fig. S14 <sup>1</sup>H-NMR spectrum of Pd(TPTTP)Cl<sub>2</sub>

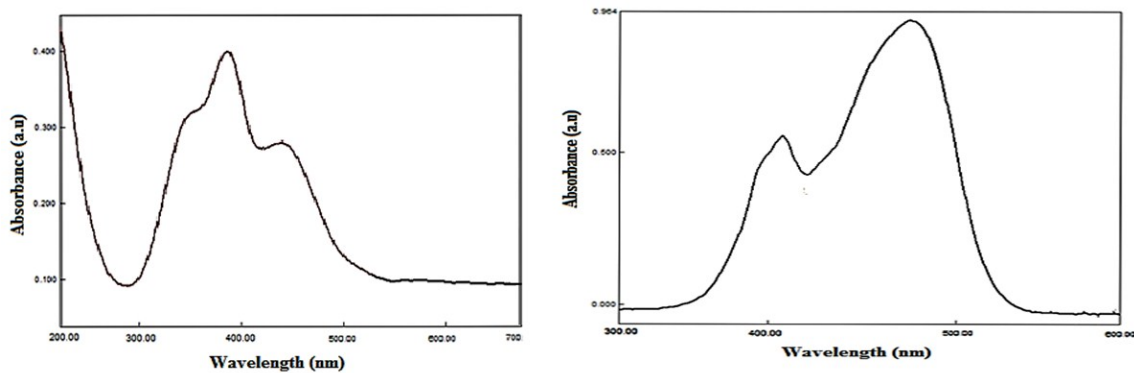

**Fig. S15 UV-Visible spectra of Pd(DPTTP)Cl<sub>2</sub> and Pd(TPTTP)Cl<sub>2</sub>**

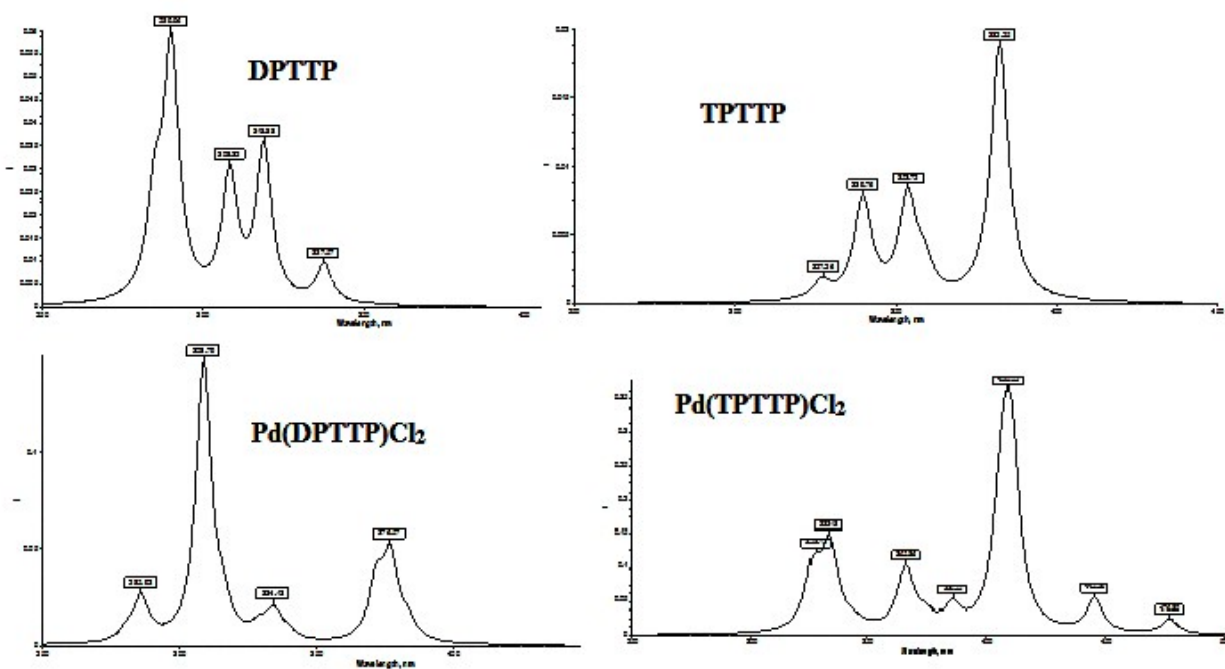

**Fig. S16 Calculated absorption spectra of Ligands and metal complexes**

<sup>1</sup>H

8.645  
8.639  
8.627  
8.300  
8.281  
8.061  
8.020  
8.002  
7.974  
7.955

2.695

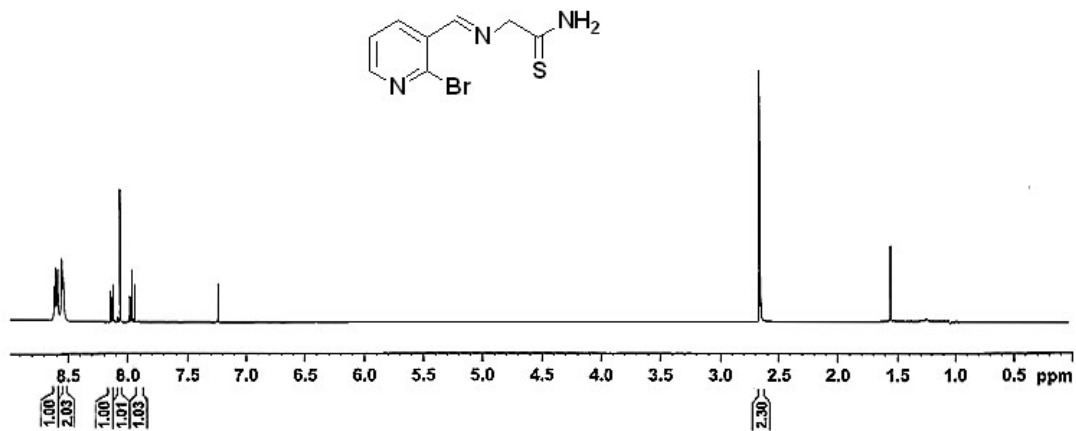

Fig. S17 <sup>1</sup>H-NMR spectrum of compound 5

<sup>1</sup>H

8.322  
7.806  
7.886  
7.422  
7.403  
7.321  
7.309  
7.300  
7.086

3.322

2.499

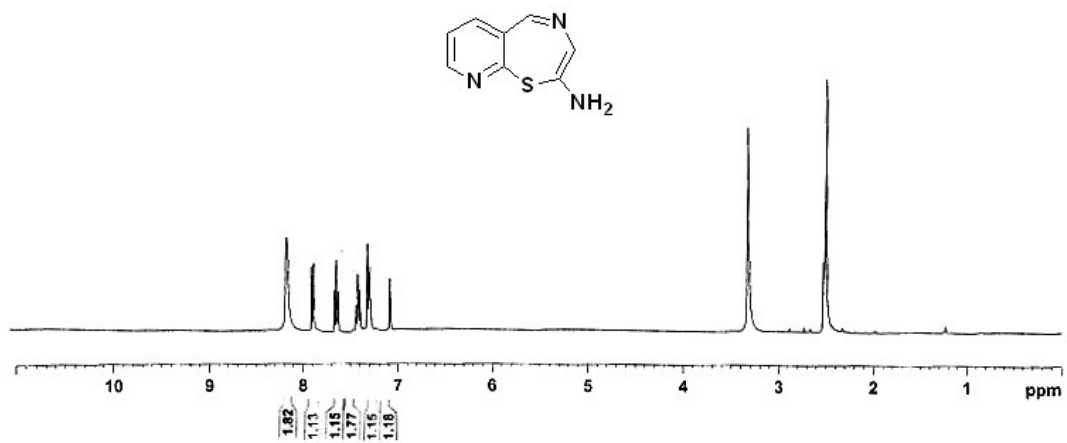

Fig. S18 <sup>1</sup>H-NMR spectrum of compound 6

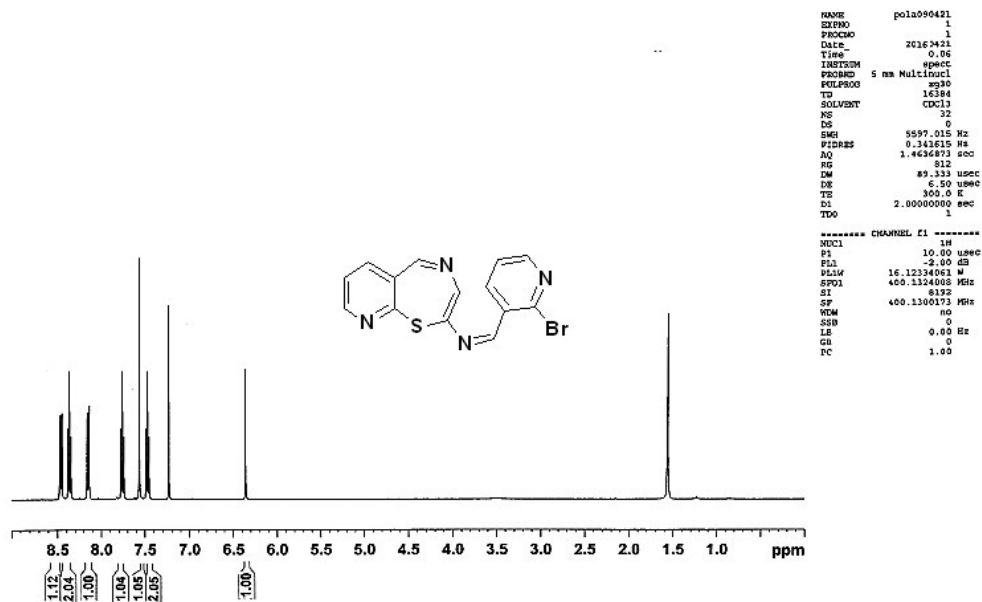

Fig. S19 <sup>1</sup>H-NMR spectrum of compound 7

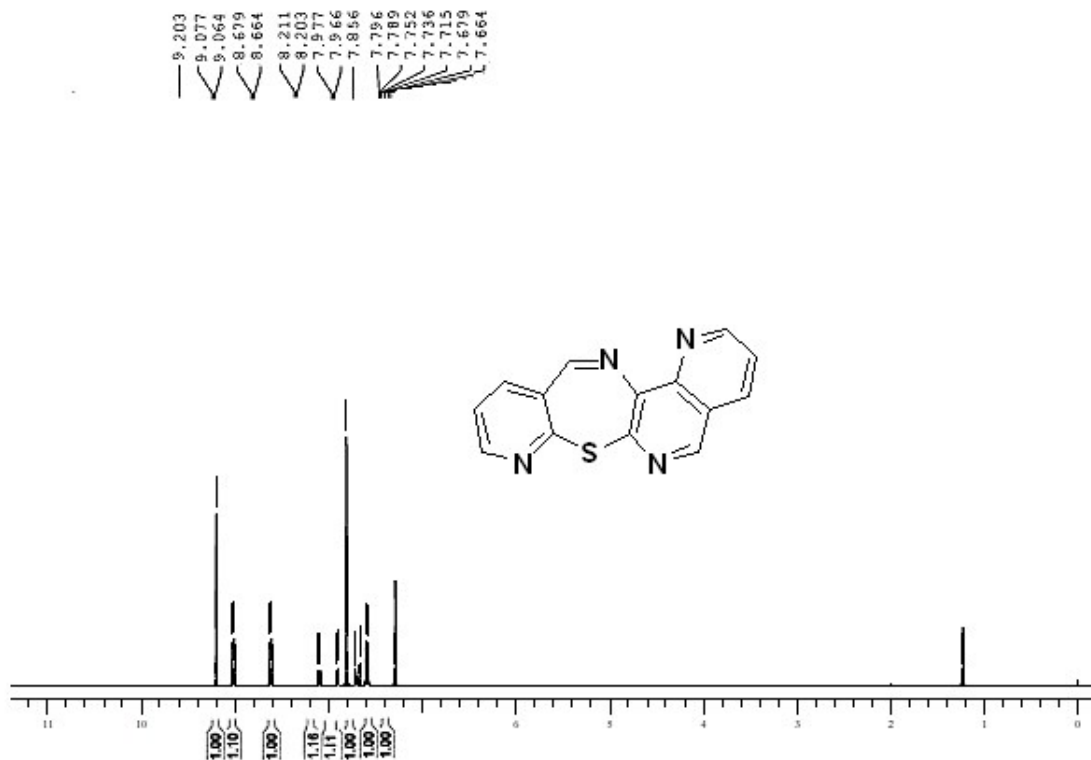

Fig. S20 <sup>1</sup>H-NMR spectrum of compound 1a

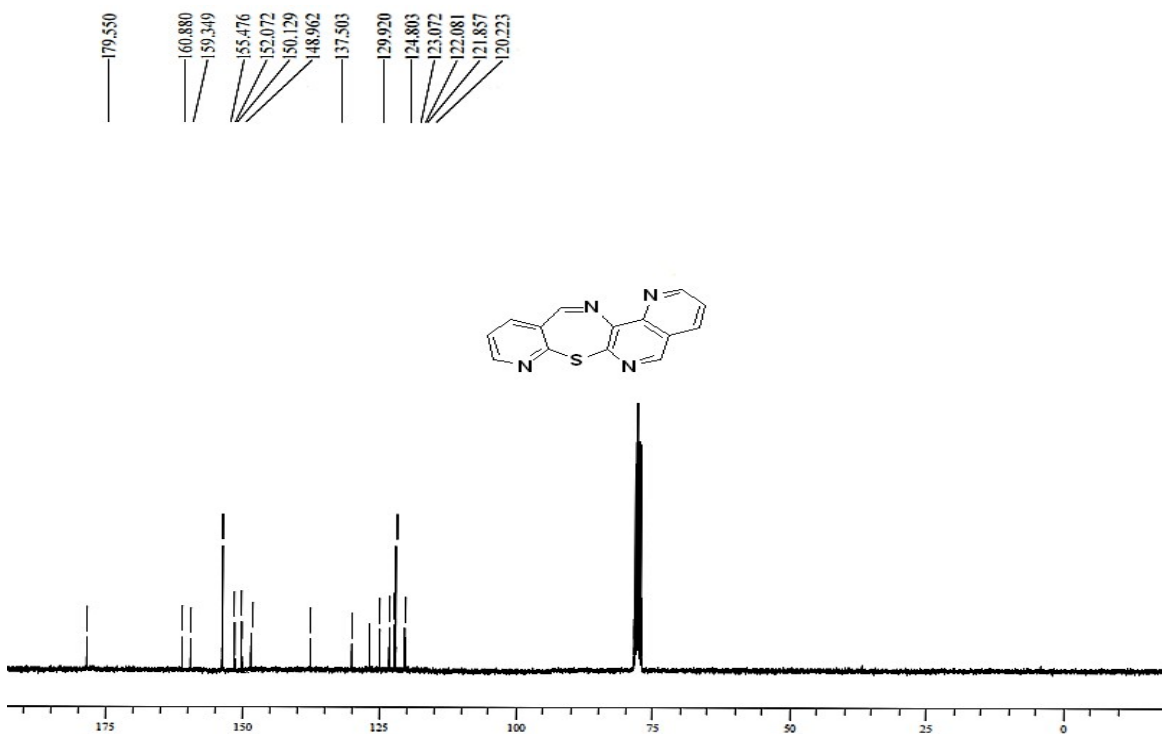

Fig. S21  $^{13}\text{C-NMR}$  spectrum of compound 1a

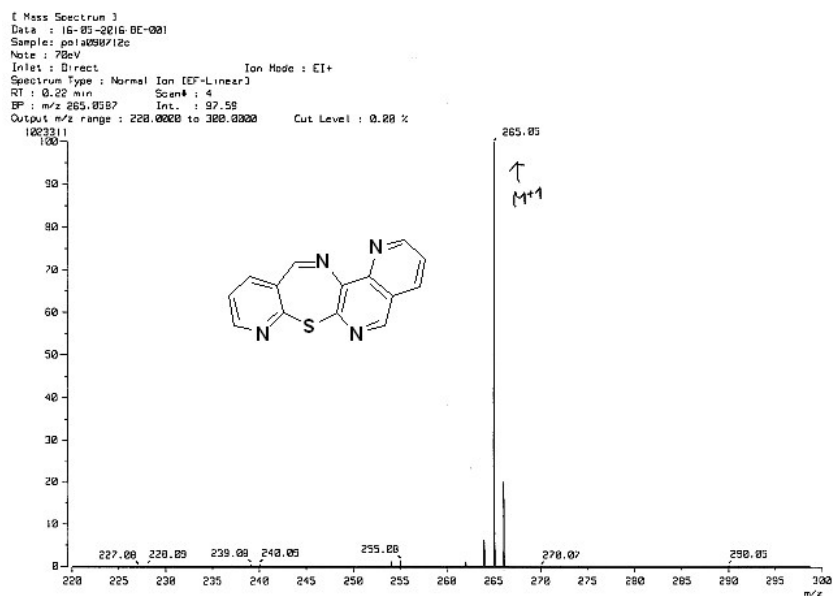

Fig. S22 Mass spectrum of compound 1a

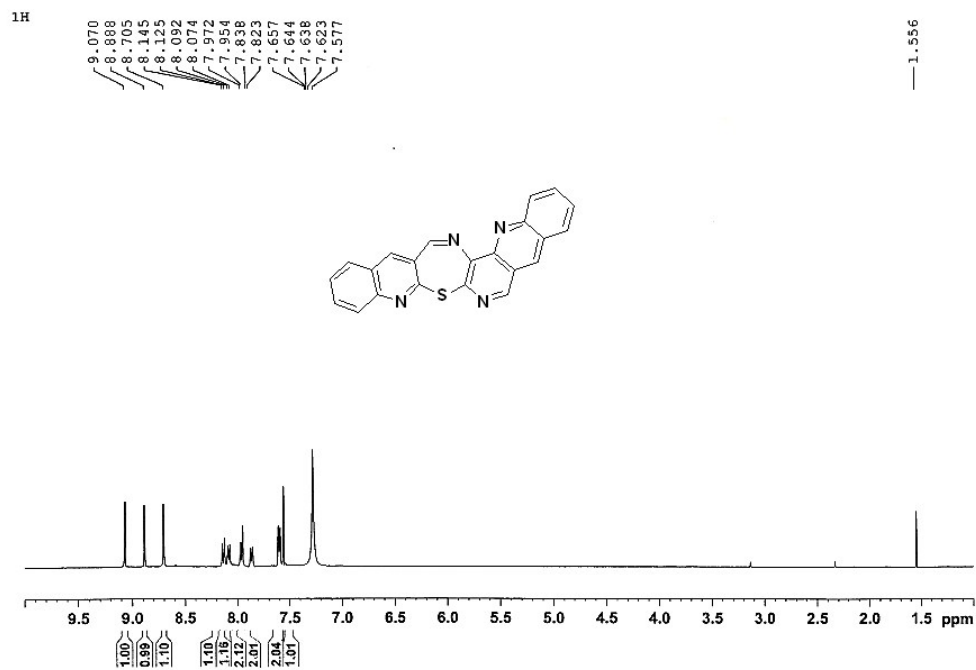

**Fig. S23 <sup>1</sup>H-NMR spectrum of compound 1b**

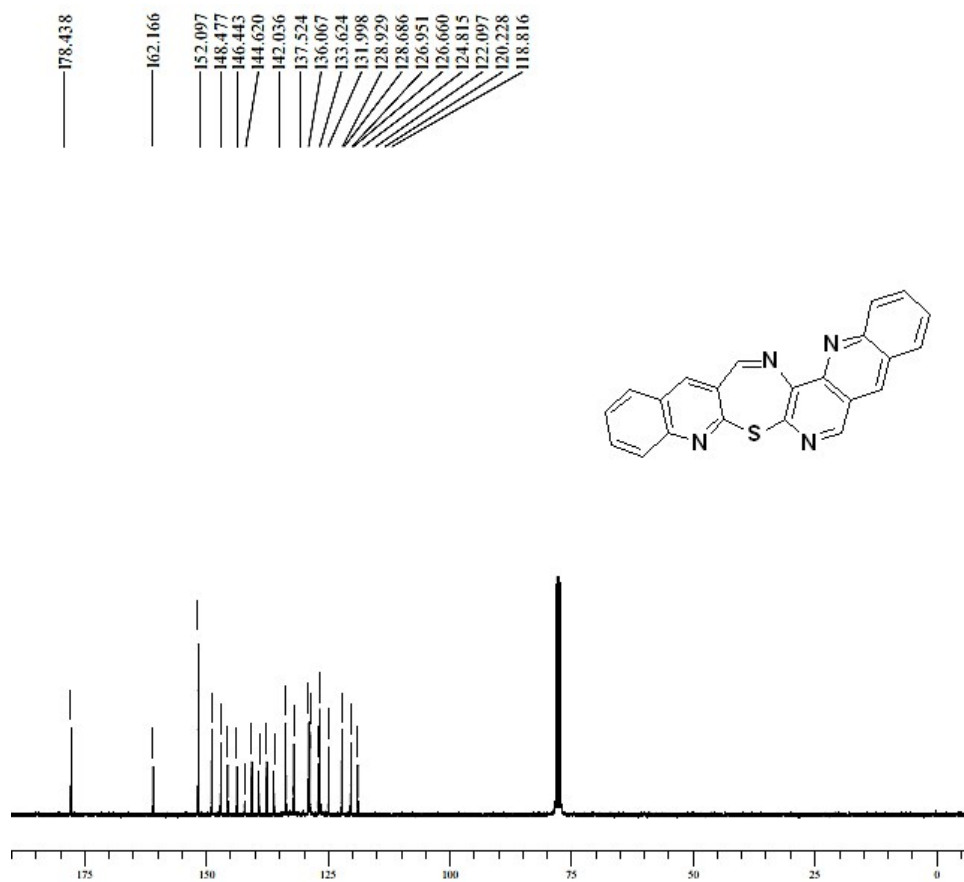

**Fig. S24 <sup>13</sup>C-NMR spectrum of compound 1b**



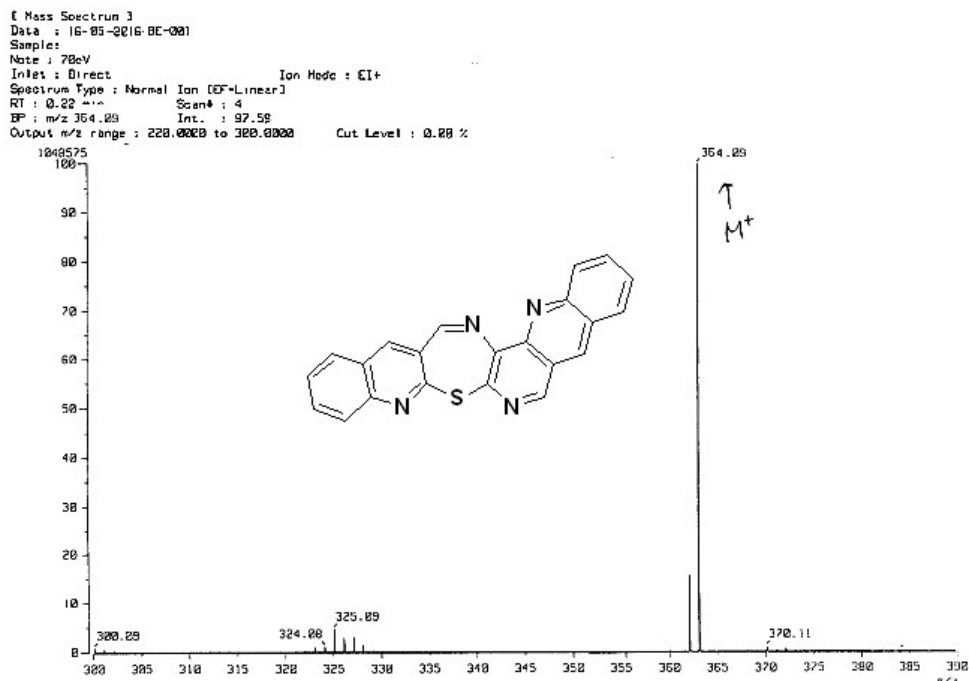

Fig. S25 Mass spectrum of compound 1b

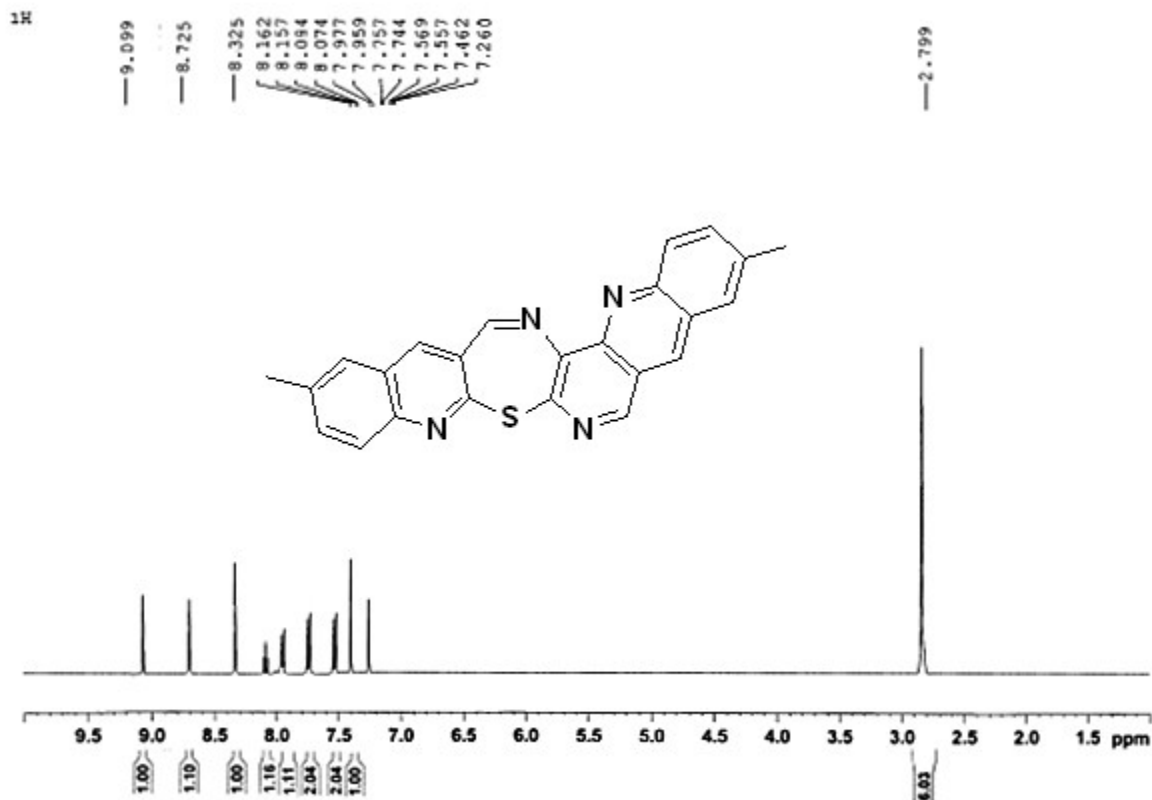

Fig. S26 <sup>1</sup>H-NMR spectrum of compound 1c

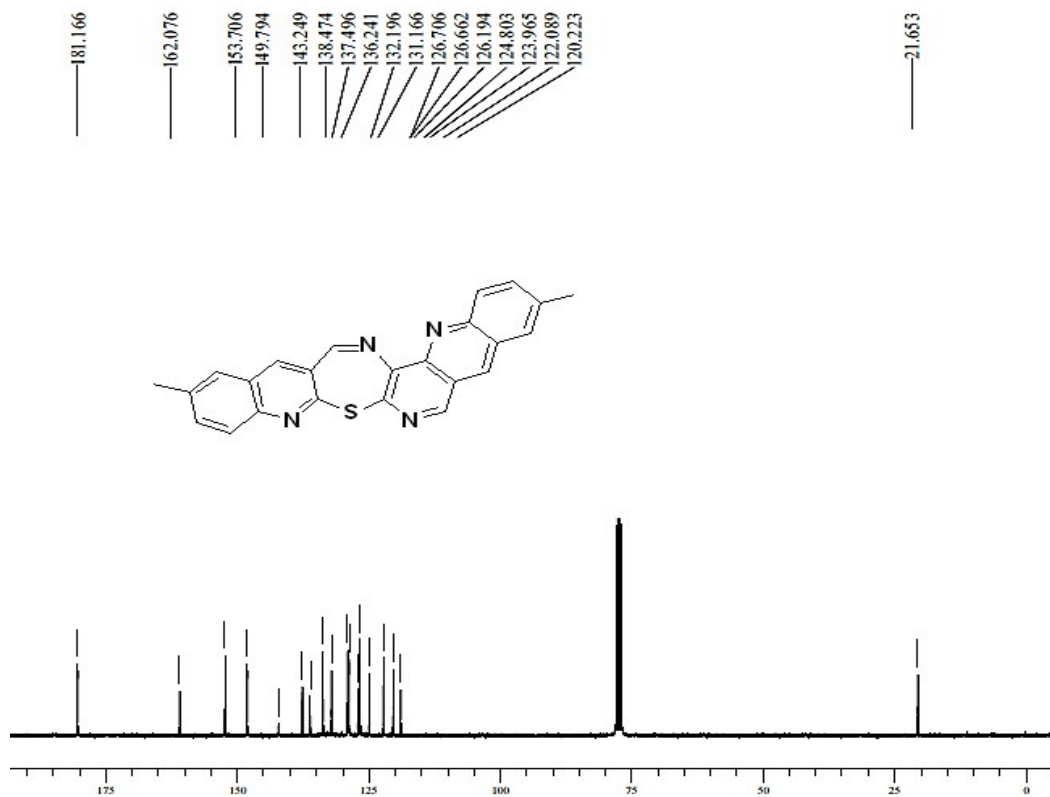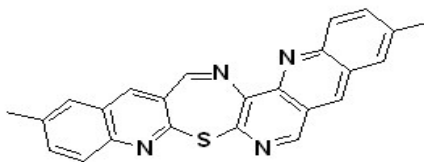

Fig. S27 <sup>13</sup>C-NMR spectrum of compound 1c

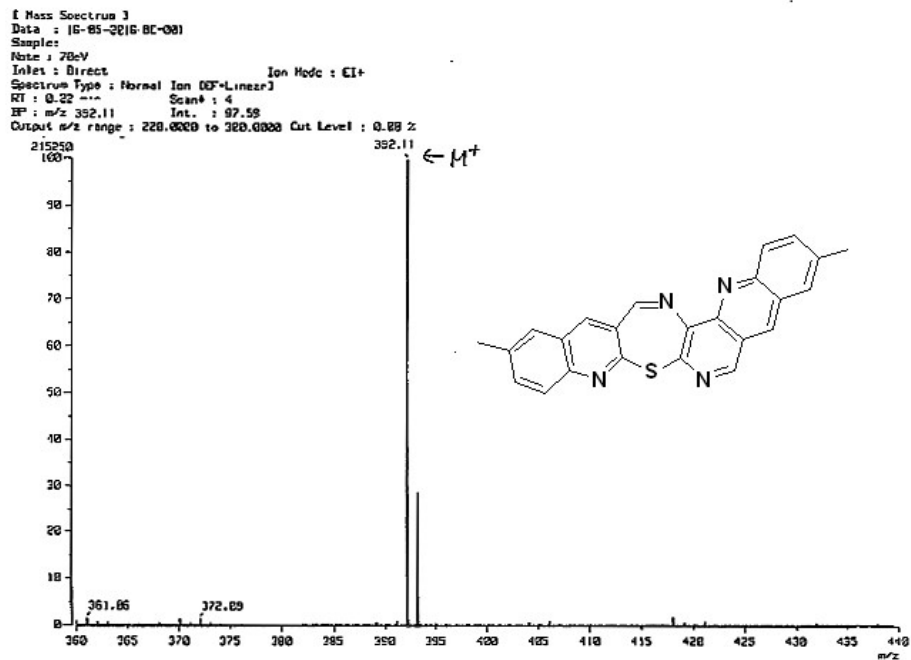

Fig. S28 Mass spectrum of compound 1c

<sup>1</sup>H

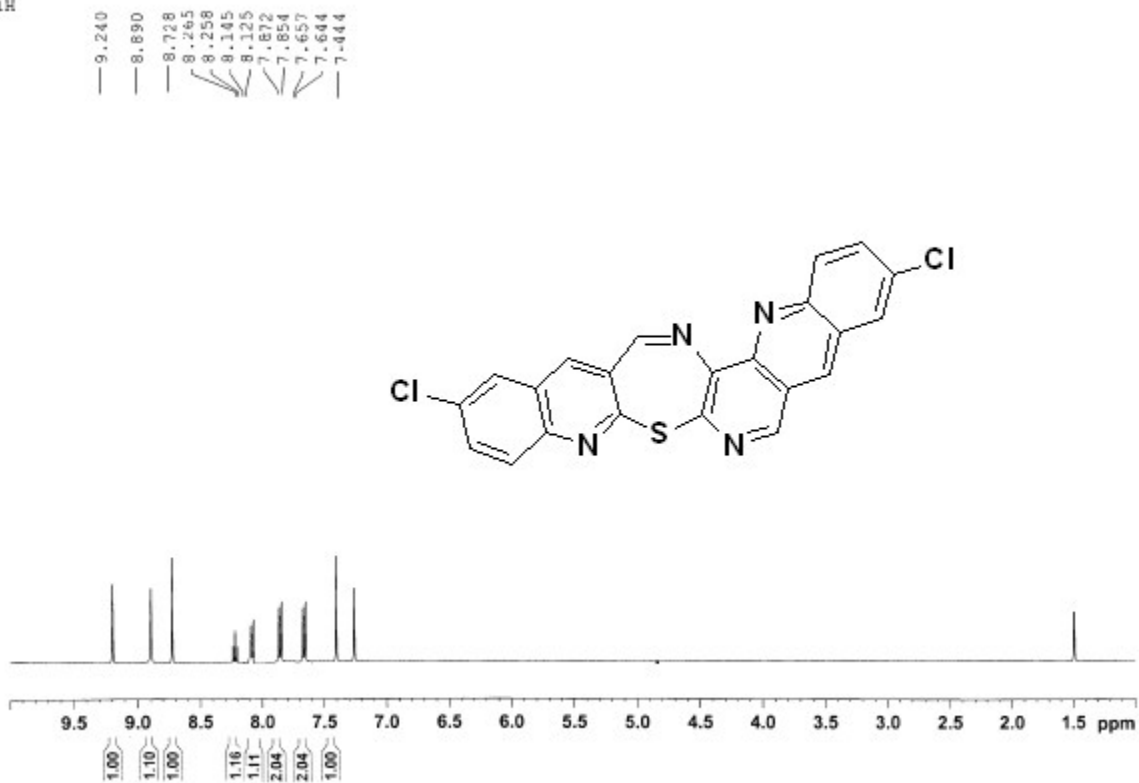

Fig. S29 <sup>1</sup>H-NMR spectrum of compound 1d

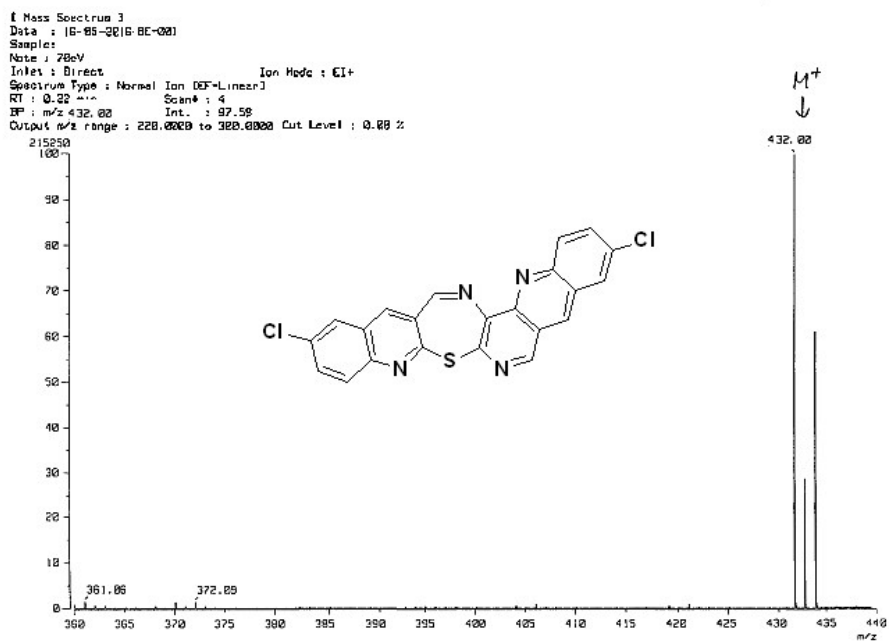

Fig. S30 Mass spectrum compound 1d

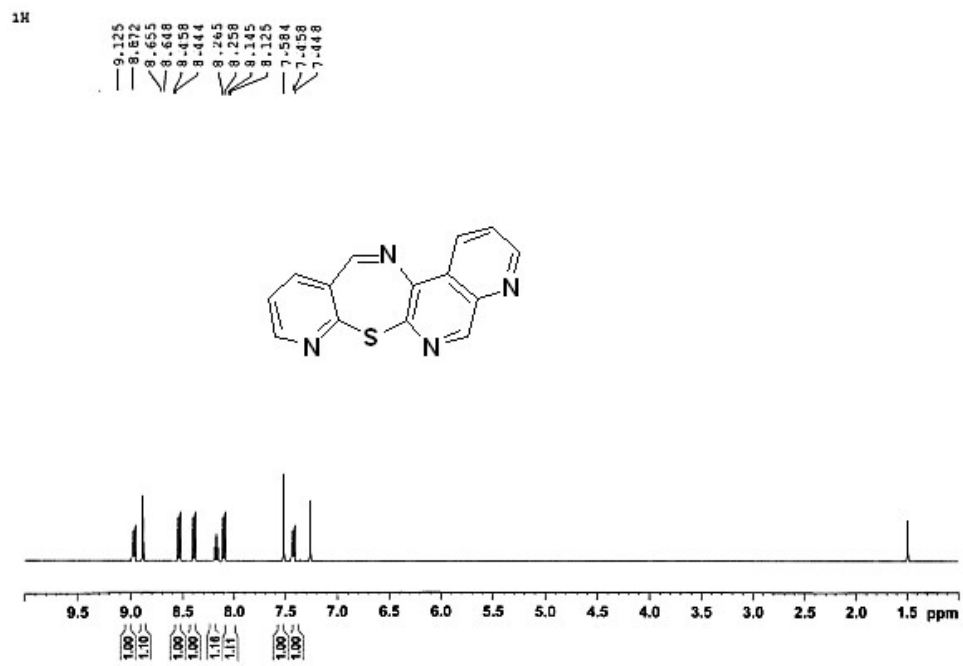

Fig. S31 <sup>1</sup>H-NMR spectrum of compound 1f

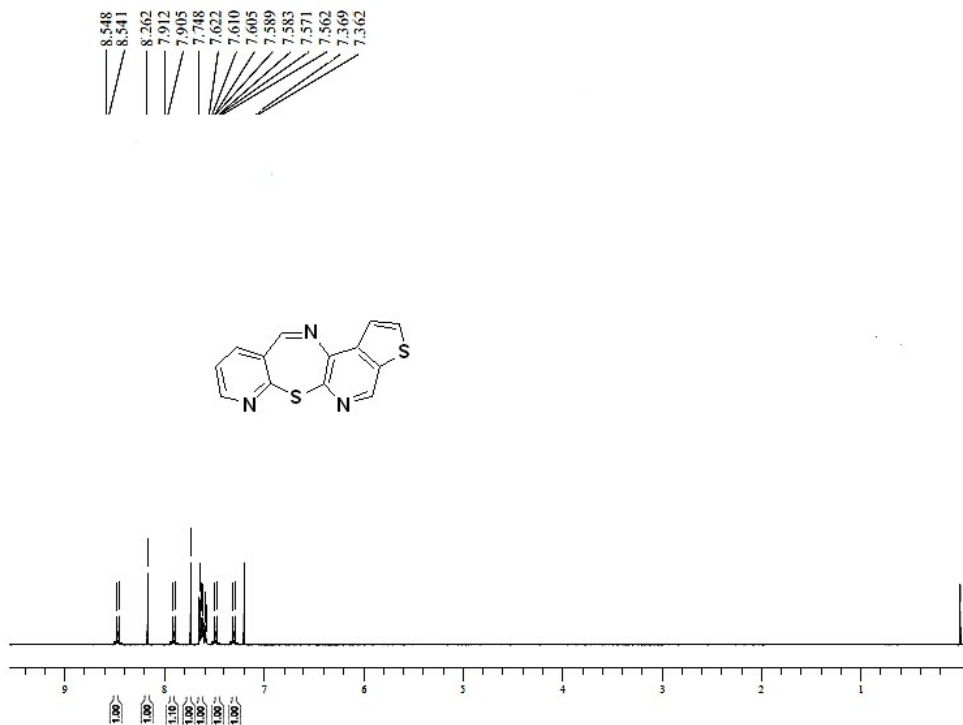

Fig. S32 <sup>1</sup>H-NMR spectrum of compound 1g

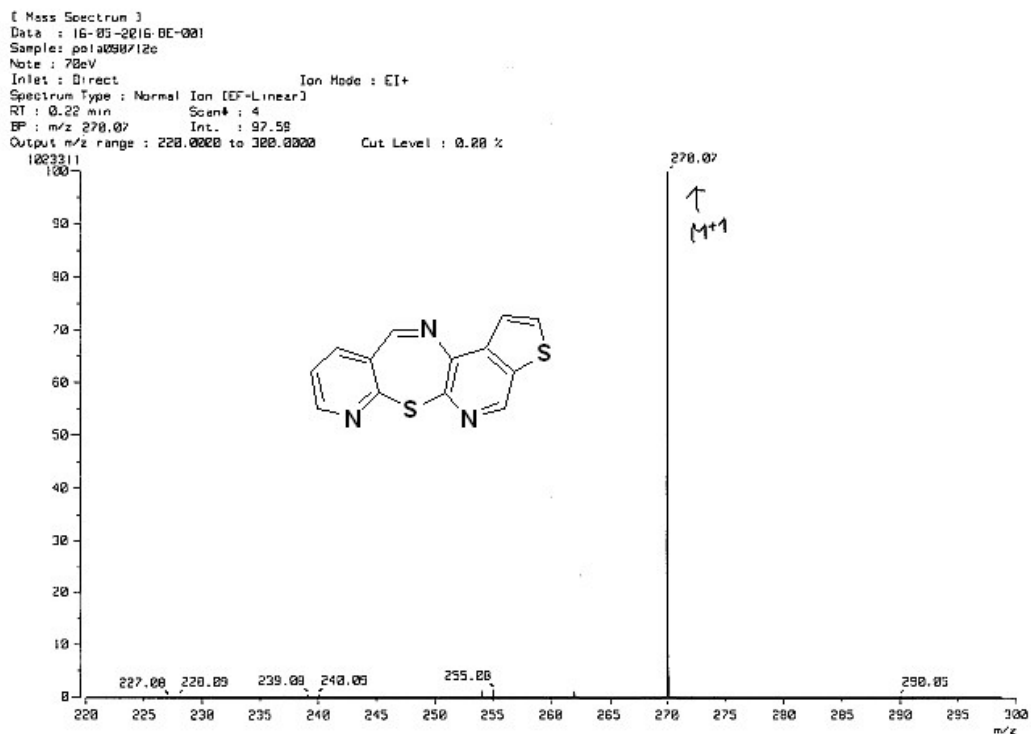

Fig. S33 Mass spectrum of compound 1g

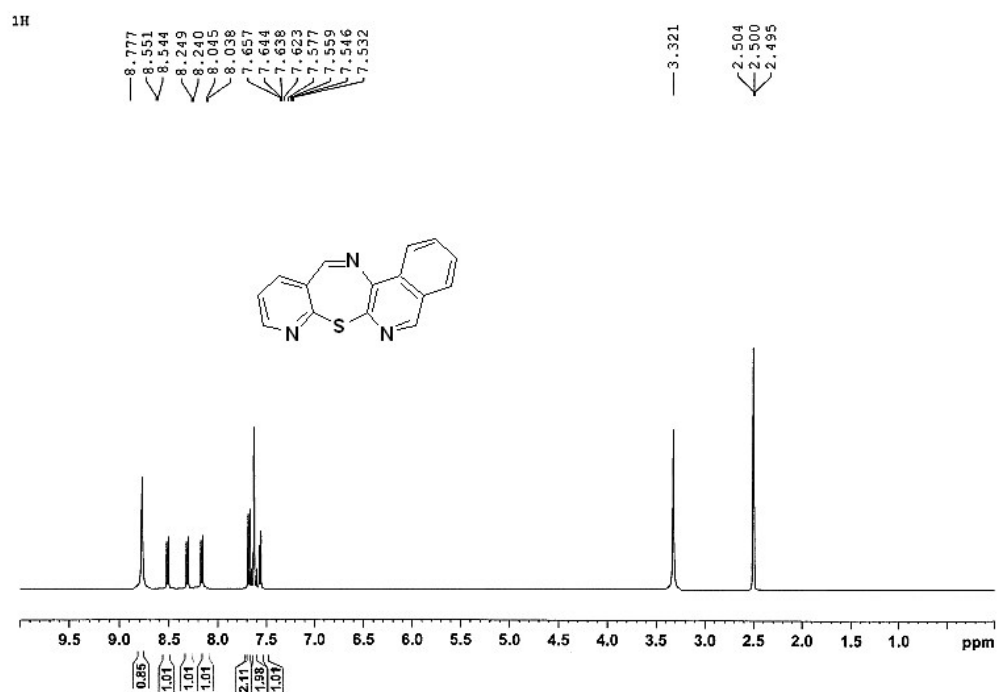

Fig. S34 <sup>1</sup>H-NMR spectrum of compound 1h

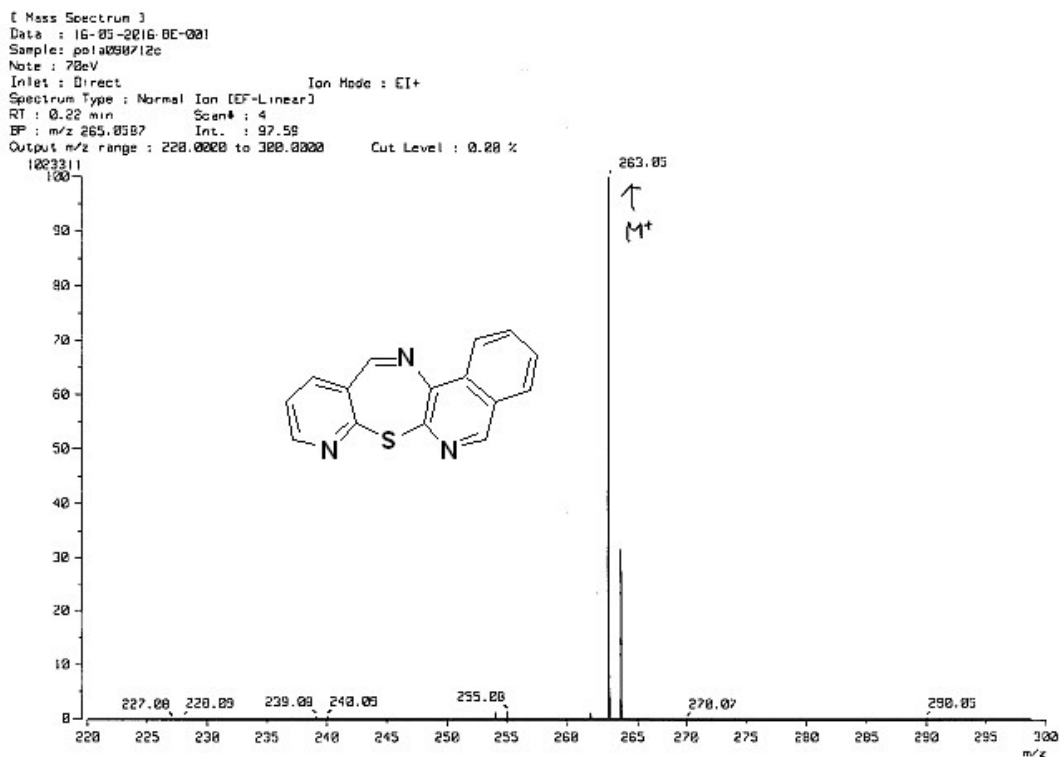

Fig. S35 Mass spectrum of compound 1h

Table S1: Absorption energies ( $\lambda$  nm), Oscillator strength ( $f$ ), Transitions and Weight in % of ligands calculated at TD-B3LYP/6-31G (d, p) level of theory for B3LYP/6-31G (d, p) optimized geometries.

| Name | State | $\lambda_{\text{abs}}$ | $f$   | Transition | % Ci       |    |
|------|-------|------------------------|-------|------------|------------|----|
| L1   | S1    | 338                    | 0.008 | H-2 -> L   | 8          |    |
|      |       |                        |       | H -> L     | 88         |    |
|      | S2    | 319                    | 0.033 | H-2 -> L   | 80         |    |
|      |       |                        |       | H-1 -> L   | 5          |    |
|      | S3    | 308                    | 0.027 | H -> L     | 8          |    |
|      |       |                        |       | H-2 -> L   | 3          |    |
|      | S4    | 290                    | 0.054 | H-1 -> L   | 86         |    |
|      |       |                        |       | H -> L+1   | 8          |    |
|      |       |                        |       | H-3 -> L   | 4          |    |
|      |       |                        |       | H-2 -> L+1 | 35         |    |
|      | S5    | 285                    | 0.020 | H-2 -> L+3 | 5          |    |
|      |       |                        |       | H-1 -> L   | 3          |    |
|      |       |                        |       | H -> L+1   | 44         |    |
|      |       |                        |       | H-3 -> L   | 3          |    |
|      |       |                        |       |            | H-2 -> L+1 | 34 |
|      |       |                        |       |            | H-2 -> L+3 | 4  |
|      |       |                        |       | H-1 -> L   | 5          |    |

|          |    |     |       |            |    |
|----------|----|-----|-------|------------|----|
|          |    |     |       | H -> L+1   | 46 |
| L2       | S1 | 382 | 0.019 | H-1 -> L   | 51 |
|          |    |     |       | H -> L     | 45 |
|          |    |     |       | H-2 -> L+1 | 2  |
|          | S2 | 359 | 0.002 | H-1 -> L   | 40 |
|          |    |     |       | H -> L     | 47 |
|          |    |     |       | H -> L+1   | 5  |
|          |    |     |       | H-3 -> L   | 2  |
|          | S3 | 354 | 0.007 | H-1 -> L   | 3  |
|          |    |     |       | H-1 -> L+1 | 49 |
|          |    |     |       | H -> L     | 5  |
|          |    |     |       | H -> L+1   | 37 |
|          |    |     |       | H-2 -> L   | 49 |
|          | S4 | 340 | 0.007 | H-1 -> L+1 | 23 |
|          |    |     |       | H -> L+1   | 24 |
|          |    |     |       | H-2 -> L   | 48 |
|          | S5 | 327 | 0.001 | H-1 -> L   | 2  |
|          |    |     |       | H-1 -> L+1 | 21 |
| H -> L+1 |    |     |       | 26         |    |

**Table S2: Absorption energies ( $\lambda$  nm), Oscillator strength ( $f$ ), Transitions and Weight in % of metal complexes calculated at TD-B3LYP/6-31G (d, p) level of theory for B3LYP/6-31G (d, p) optimized geometries.**

| Name  | State | $\lambda_{abs}$ | $f$   | Transition | % Ci |
|-------|-------|-----------------|-------|------------|------|
| L1-Pd | S1    | 384             | 0.008 | H-3 -> L   | 4    |
|       |       |                 |       | H-2 -> L+1 | 82   |
|       |       |                 |       | H -> L+1   | 12   |
|       | S2    | 381             | 0.002 | H-3 -> L+1 | 30   |
|       |       |                 |       | H-2 -> L   | 52   |
|       |       |                 |       | H -> L     | 14   |
|       | S3    | 378             | 0.002 | H-3 -> L+1 | 10   |
|       |       |                 |       | H-1 -> L+1 | 15   |
|       |       |                 |       | H-1 -> L+2 | 2    |
|       | S4    | 377             | 0.038 | H -> L     | 71   |
|       |       |                 |       | H-3 -> L+1 | 56   |
|       |       |                 |       | H-2 -> L   | 38   |
|       | S5    | 372             | 0.030 | H-3 -> L   | 91   |
|       |       |                 |       | H-2 -> L+1 | 4    |
|       |       |                 |       | H-2 -> L+2 | 3    |
| L2-Pd | S1    | 477             | 0.023 | H -> L     | 93   |
|       | S2    | 445             | 0.051 | H-5 -> L   | 5    |
|       |       |                 |       | H-1 -> L   | 90   |
|       | S3    | 411             | 0.011 | H-4 -> L   | 22   |
|       |       |                 |       | H-2 -> L   | 75   |
|       | S4    | 411             | 0.154 | H-10 -> L  | 4    |
|       |       |                 |       | H-5 -> L   | 31   |

|  |    |     |       |          |    |
|--|----|-----|-------|----------|----|
|  |    |     |       | H-3 -> L | 26 |
|  |    |     |       | H -> L+1 | 34 |
|  | S5 | 409 | 0.023 | H-4 -> L | 74 |
|  |    |     |       | H-2 -> L | 23 |
